# Supplementary material for: Acute-Phase CD8 T Cell Responses That Select for Escape Variants Are Needed to Control Live Attenuated Simian Immunodeficiency Virus
Source: J Virol. 2013 Aug;87(16):9353–64. doi: 10.1128/JVI.00909-13 (PMC3754066; doi:10.1128/JVI.00909-13)
Supplement: Supplemental material [file JVI.00909-13_zjv999097986so1.pdf]

### **Supplemental Figure Legends:**

**Supplemental Figure 1. Mapping the ARF1<sub>30-40</sub>QL11 epitope.** (A) Amino acid sequences in Env and ARF1 spanning the nucleotide region with detected sequence variation. (B) The frequencies of CD3+CD8+ T cells producing IFN $\gamma$  and/or TNF $\alpha$  after incubation of the polyclonal T cell line with the indicated peptides are shown. (C) MHC class I transferent cell lines expressing the indicated MHC class I alleles were pulsed with the ARF1<sub>30-40</sub>QL11 peptide and co-cultured with the polyclonal T cell line grown against ARF1<sub>29-43</sub>VY15. Activation of CD8 T cells was measured by intracellular cytokine staining.

**Supplemental Figure 2. The in vitro fitness of m3KO $\Delta$ nef is comparable to SIVmac239 $\Delta$ nef.** In vitro co-culture fitness assays were performed with m3KO $\Delta$ nef and SIVmac239 $\Delta$ nef. For each assay, a barcoded SIV $\Delta$ nef (BCV $\Delta$ nef) was included as a reference. The barcoded virus was included at a 1:9, 1:1, or 9:1 ratio of p27 content relative to the query virus in the inoculum. The ratio of the number of copies of query virus to barcoded virus was determined at each time point relative to the ratio of the number of copies of query virus to barcoded virus present in the inoculum. Unpaired t-tests were performed at each time point.

**Supplemental Figure 3. Immune activation in MCMs infected with m3KO $\Delta$ nef or SIVmac239 $\Delta$ nef.** The frequencies of CD3+CD4+ or CD3+CD8+ T cells that were also CD38+ and Ki67+ were measured in blood or cells isolated from bronchoalveolar lavage fluid (BAL) or blood on days 0, 14, and 21 after infection. The legend below the graph

indicates the MHC genotype and the infecting virus. Each line represents a different animal.

**Supplemental Figure 4. Genome-wide nucleotide variation at three weeks after infection with SIVmac239Δnef.** Collected sequences were aligned to SIVmac239 as described in the Materials and Methods. Variants spanning positions 1,300 to 10,200 are shown if the percent variation was >1% and greater than three times the percentage of uncertain or indel sequences. The dashed horizontal line marks variation present at 20%. The vertical dark gray box spans the 182bp sequence in *nef* that is absent in SIVmac239Δnef. Animal identification numbers are shown to the left of each graph.

**Supplemental Figure 5. Genome-wide nucleotide variation at three weeks post infection with m3KOΔnef.** Sequences collected were aligned to SIVmac239 as described in the Materials and Methods. Variants spanning positions 1,300 to 10,200 are shown if the percent variation was >1% and greater than three times the percentage of uncertain or indel sequences. The dashed vertical line identifies the location of ARF1<sub>30-40</sub>QL11. The vertical dark gray box spans the 182bp sequence in *nef* that is absent in m3KOΔnef. Mutations engineered into SIVmac239 to create m3KOΔnef are shown in red. If a mutation is nonsynonymous in one reading frame, but synonymous in an alternate reading frame, then the red filled circle has a black ring. The substitution at position 6925 in m3KOΔnef is synonymous on its own, but is nonsynonymous when linked to 6923, so the black ring overlaps the red filled circle. Animal identification numbers are shown to the left of each graph.

**Supplemental Figure 6. Genome-wide nucleotide variation at twelve weeks after infection with m3KOΔnef.** Collected sequences were aligned to SIVmac239 as described in the Materials and Methods. Variants spanning positions 1,300 to 10,200 are shown if the percent variation was >1% and greater than three times the percentage of uncertain or indel sequences. The vertical light gray box spans a region where sequence data could not be obtained from virus populations replicating in CY0381. The vertical dark gray box spans the 182bp sequence in *nef* that is absent in m3KOΔnef. Mutations engineered into SIVmac239 to create m3KOΔnef are shown in red. If a mutation is nonsynonymous in one reading frame, but synonymous in an alternate reading frame, then the red filled circle has a black ring. The substitution at position 6925 in m3KOΔnef is synonymous on its own, but is nonsynonymous when linked to 6923, so the black ring overlaps the red filled circle. Animal identification numbers are shown to the left of each graph.

**Supplemental Table 1. Average frequencies of CD38+Ki67+ T cells in BAL fluid and blood during acute infection**

| <b><u>Group</u></b>   | <b><u>Avg frequency of CD38+Ki67+ cells in animals infected with m3KO<math>\Delta</math>nef (n=6)</u></b> | <b><u>Avg frequency of CD38+Ki67+ cells in animals infected with SIVmac239<math>\Delta</math>nef (n=3)</u></b> |
|-----------------------|-----------------------------------------------------------------------------------------------------------|----------------------------------------------------------------------------------------------------------------|
| CD3+CD4+ BAL Day 0    | 6.75                                                                                                      | 6.0                                                                                                            |
| CD3+CD4+ BAL Day 14   | 36.4                                                                                                      | 15.8                                                                                                           |
| CD3+CD4+ BAL Day 21   | 28.9                                                                                                      | 10.7                                                                                                           |
| CD3+CD4+ Blood Day 0  | 7.94                                                                                                      | 2.29                                                                                                           |
| CD3+CD4+ Blood Day 14 | 4.19                                                                                                      | 2.21                                                                                                           |
| CD3+CD4+ Blood Day 21 | 10.4                                                                                                      | 1.54                                                                                                           |
| CD3+CD8+ BAL Day 0    | 6.18                                                                                                      | 9.77                                                                                                           |
| CD3+CD8+ BAL Day 14   | 80.0                                                                                                      | 15.7                                                                                                           |
| CD3+CD8+ BAL Day 21   | 22.7                                                                                                      | 18.2                                                                                                           |
| CD3+CD8+ Blood Day 0  | 6.37                                                                                                      | 1.84                                                                                                           |
| CD3+CD8+ Blood Day 14 | 7.46                                                                                                      | 4.07                                                                                                           |
| CD3+CD8+ Blood Day 21 | 14.7                                                                                                      | 1.93                                                                                                           |

The average frequencies of CD3+CD4+ or CD3+CD8+ T cells that are CD38+Ki67+ are shown for samples taken from the different sites at the different time points.

**Supplemental Table 2. Metrics of genome-wide sequences collected for virus populations isolated after infection with m3KO $\Delta$ nef or SIVmac239 $\Delta$ nef.**

| <b><u>Animal &amp; time point</u></b> | <b><u># of reads</u></b> | <b><u>Avg. Coverage</u></b> | <b><u>Min. Coverage</u></b> | <b><u>Max. Coverage</u></b> | <b><u>Viral load</u></b> |
|---------------------------------------|--------------------------|-----------------------------|-----------------------------|-----------------------------|--------------------------|
| CY0379 3wk                            | 60,527                   | 1555                        | 67                          | 3331                        | 36,700                   |
| CY0381 3wk                            | 47,896                   | 1053                        | 28                          | 2866                        | 125,000                  |
| CY0384 3wk                            | 50,878                   | 1134                        | 28                          | 2964                        | 64,500                   |
| CY0385 3wk                            | 59,366                   | 1301                        | 30                          | 3745                        | 55,700                   |
| CY0348 3wk                            | 42,951                   | 1251                        | 52                          | 2686                        | 9,800                    |
| CY0382 3wk                            | 59,974                   | 1595                        | 36                          | 3058                        | 4,150                    |
| CY0383 3wk                            | 49,072                   | 1282                        | 34                          | 2513                        | 3,750                    |
| CY0379 12wk                           | 14,344                   | 420                         | 11                          | 823                         | 7,170                    |
| CY0381 12wk                           | 14,484                   | 538                         | 11                          | 1026                        | 2,280                    |
| CY0384 12wk                           | 13,322                   | 395                         | 14                          | 1048                        | 200                      |
| CY0385 12wk                           | 12,159                   | 381                         | 9                           | 719                         | 8,680                    |
| CY0338 3wk                            | 37,006                   | 1062                        | 38                          | 2384                        | 5,450                    |
| CY0345 3wk                            | 36,377                   | 1066                        | 27                          | 2140                        | 5,930                    |
| CY0386 3wk                            | 42,608                   | 1227                        | 44                          | 2557                        | 1,370                    |

Metrics for the collected sequences are shown in the table. The total number of sequencing reads for each sample is listed. Coverage of total A, C, T, and G nucleotides at each position from 1,300 to 10,200 (excluding the deletion in *nef* from position 9507 to 9688) was quantified. The average coverage, minimum coverage, and maximum coverage are shown across these positions. The viral load (copies/ml) for each animal at the given time point is also shown.

**Supplemental Table 3. Coverage at each described epitope**

| <b>Animal &amp; time<br/>point</b> | <b><u>ARF1<sub>30-40</sub>QL11</u></b> | <b><u>Env<sub>338-346</sub>RF9</u></b> |
|------------------------------------|----------------------------------------|----------------------------------------|
| CY0379 3wk                         | 477                                    | 845                                    |
| CY0381 3wk                         | 343                                    | 939                                    |
| CY0384 3wk                         | 395                                    | 978                                    |
| CY0385 3wk                         | 428                                    | 1167                                   |
| CY0332 4wk                         | 598                                    | --                                     |
| CY0333 4wk                         | 732                                    | --                                     |
| CY0334 4wk                         | 307                                    | --                                     |
| CY0335 4wk                         | 434                                    | --                                     |
| CY0336 4wk                         | 666                                    | --                                     |
| CY0337 4wk                         | 741                                    | --                                     |
| CY0332 12wk                        | 137                                    | 557                                    |
| CY0333 12wk                        | 650                                    | 850                                    |
| CY0334 12wk                        | 400                                    | 450                                    |
| CY0335 12wk                        | 342                                    | 514                                    |
| CY0336 12wk                        | 499                                    | 821                                    |
| CY0337 12wk                        | 755                                    | 949                                    |
| CY0379 12wk                        | --                                     | 294                                    |
| CY0381 12wk                        | --                                     | 495                                    |
| CY0384 12wk                        | --                                     | 389                                    |
| CY0385 12wk                        | --                                     | 250                                    |

The table shows the number of total reads with complete high quality sequence data for each epitope in each population of viruses. A double dash indicates that the specific epitope was not analyzed in this manuscript for this data set.

Supplemental Figure 1

A.

|                 |                                    |
|-----------------|------------------------------------|
| Env (43 to 58)  | FCATKNRDTWGT <b>TQCL</b>           |
| ARF1 (28 to 43) | FV <b>Q</b> PRIGILGE <b>Q</b> LSAY |

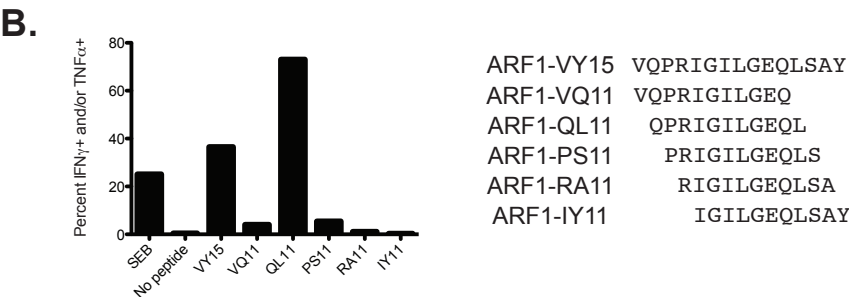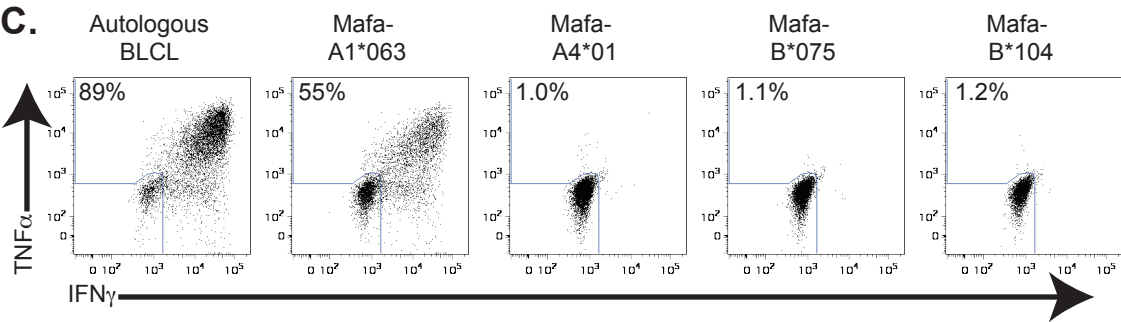

## Supplemental Figure 2

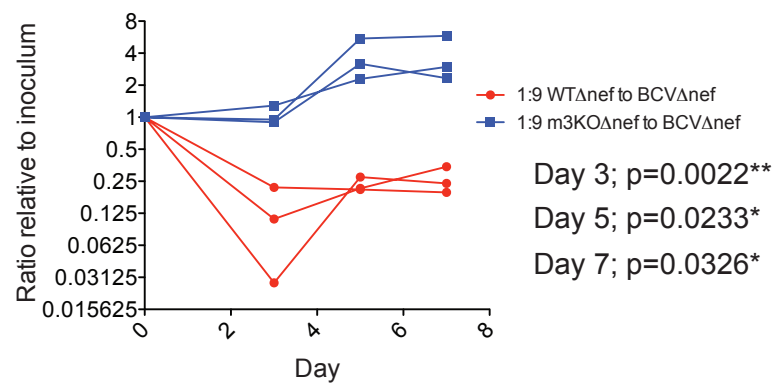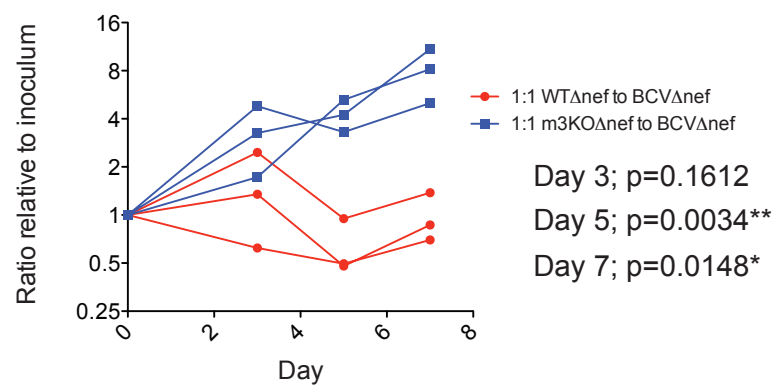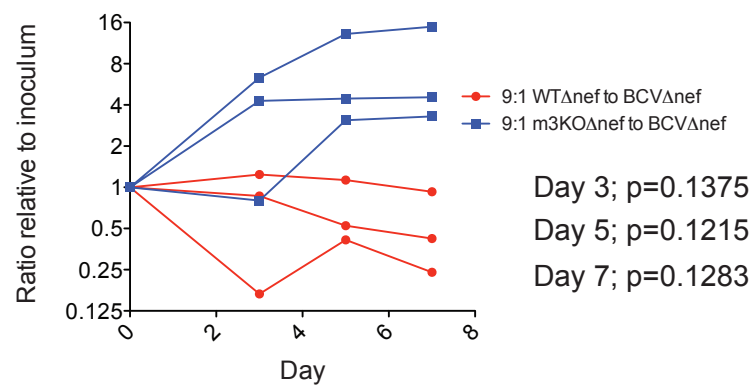

Supplemental Figure 3

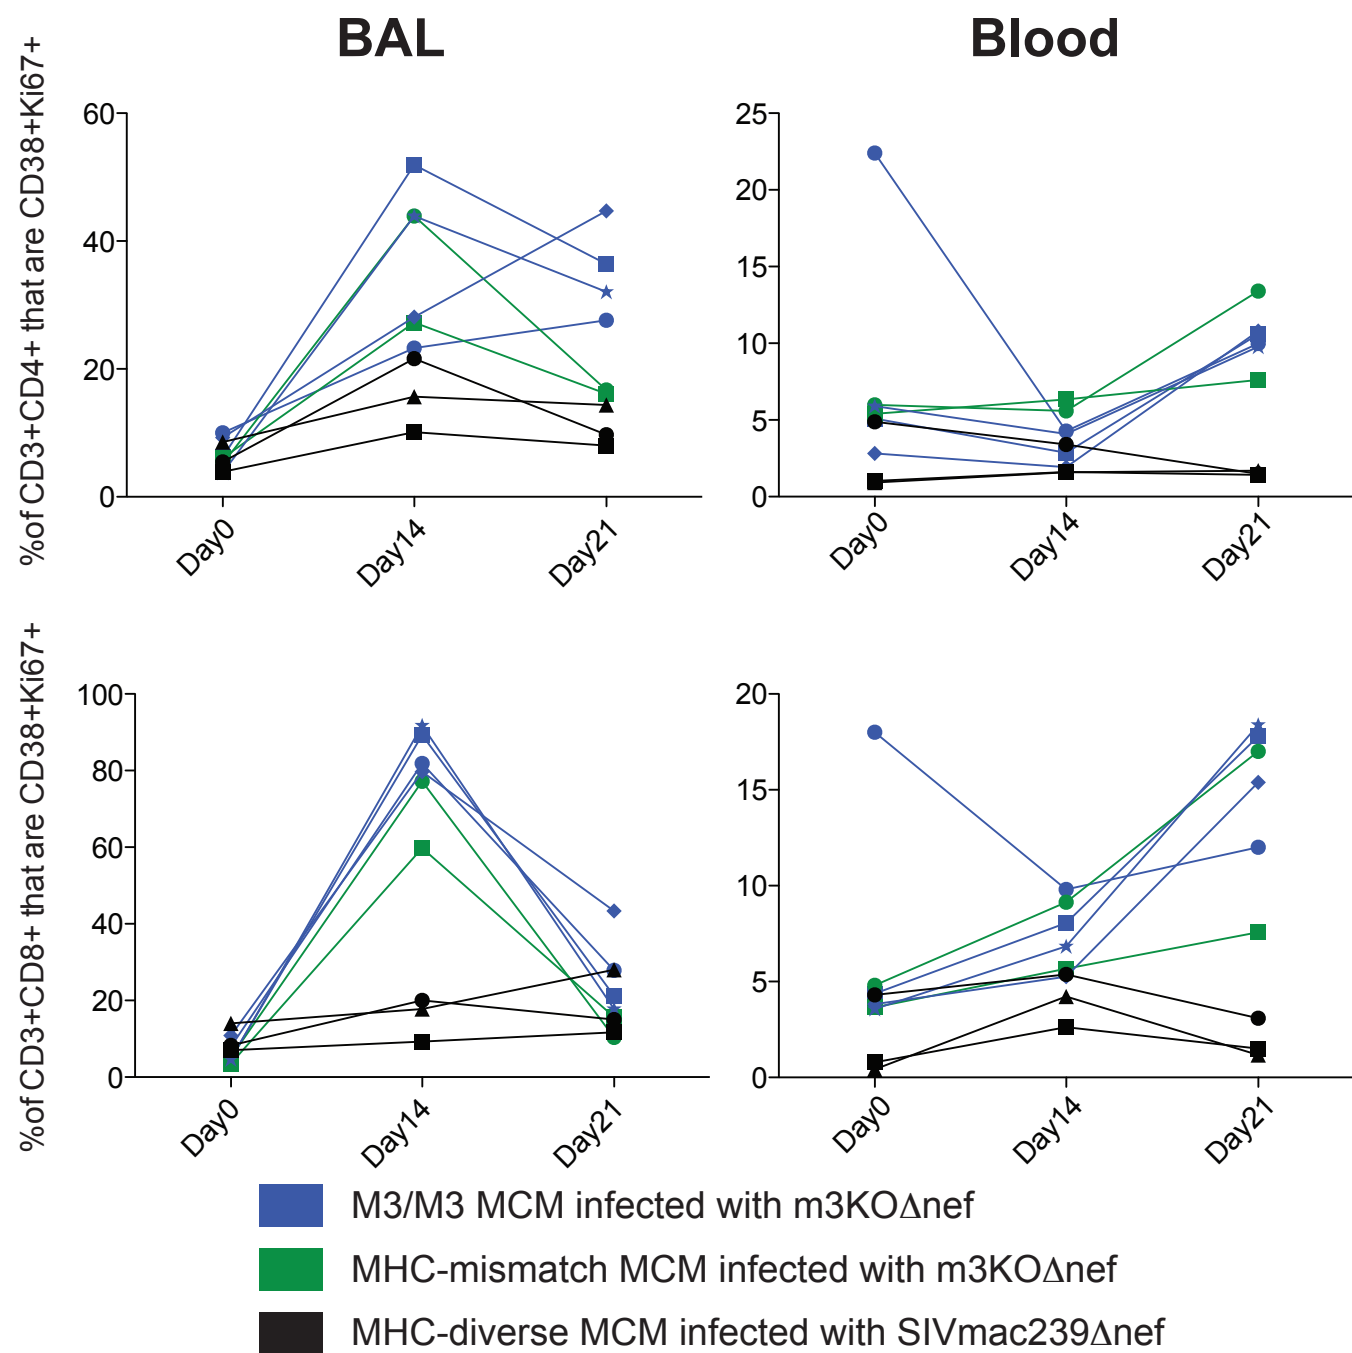

Supplemental Figure 4

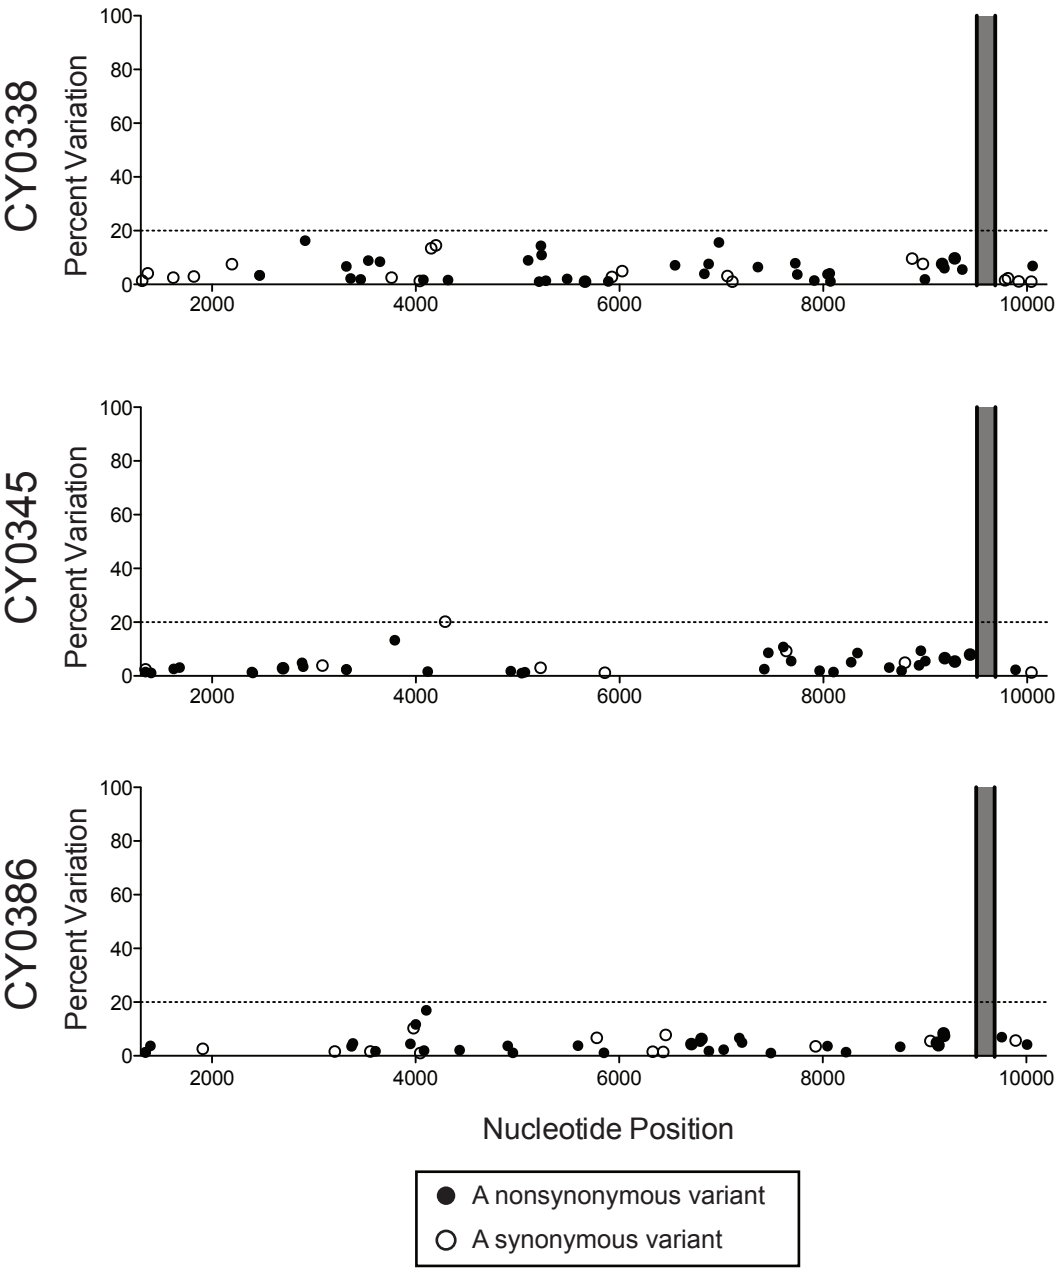

Supplemental Figure 5

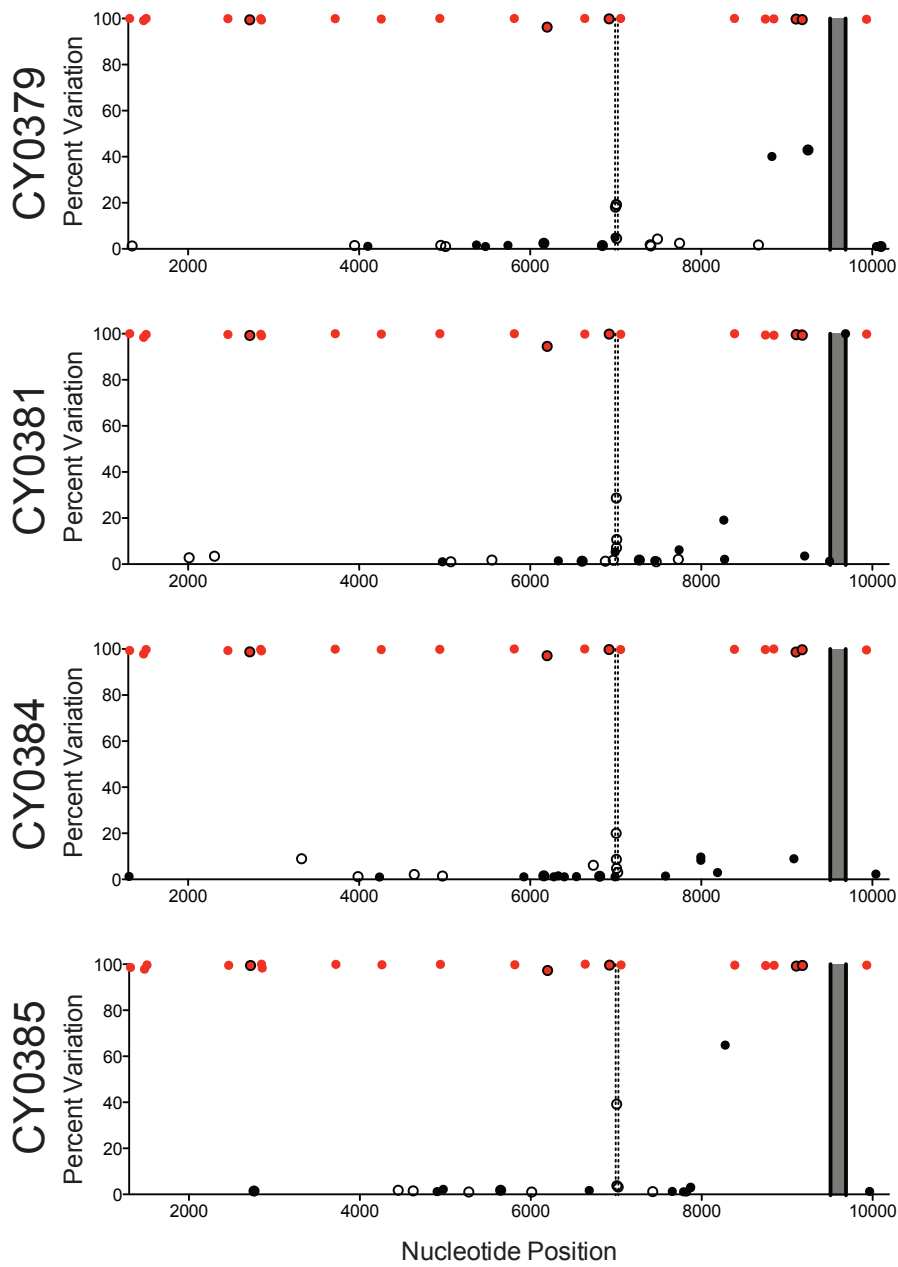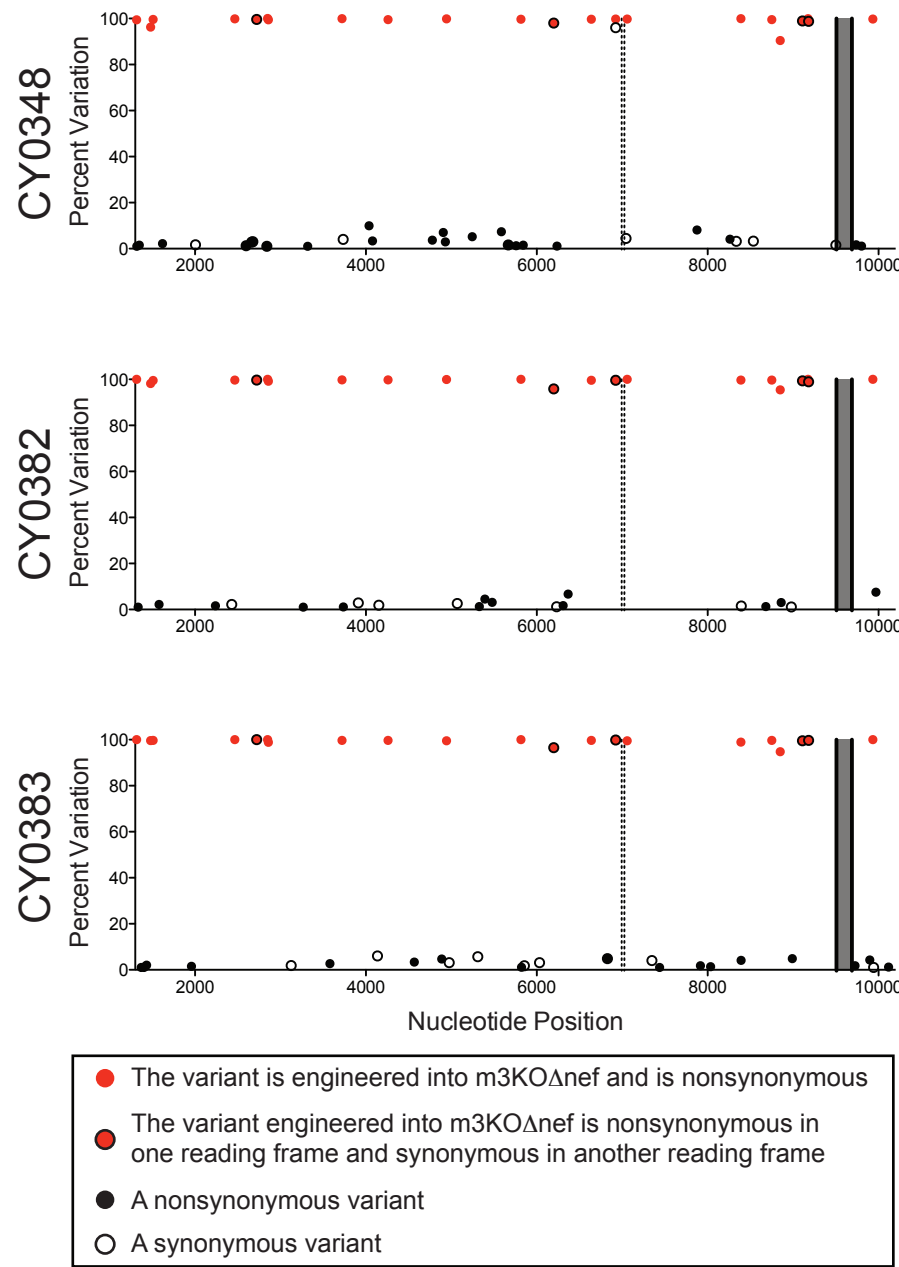

## Supplemental Figure 6

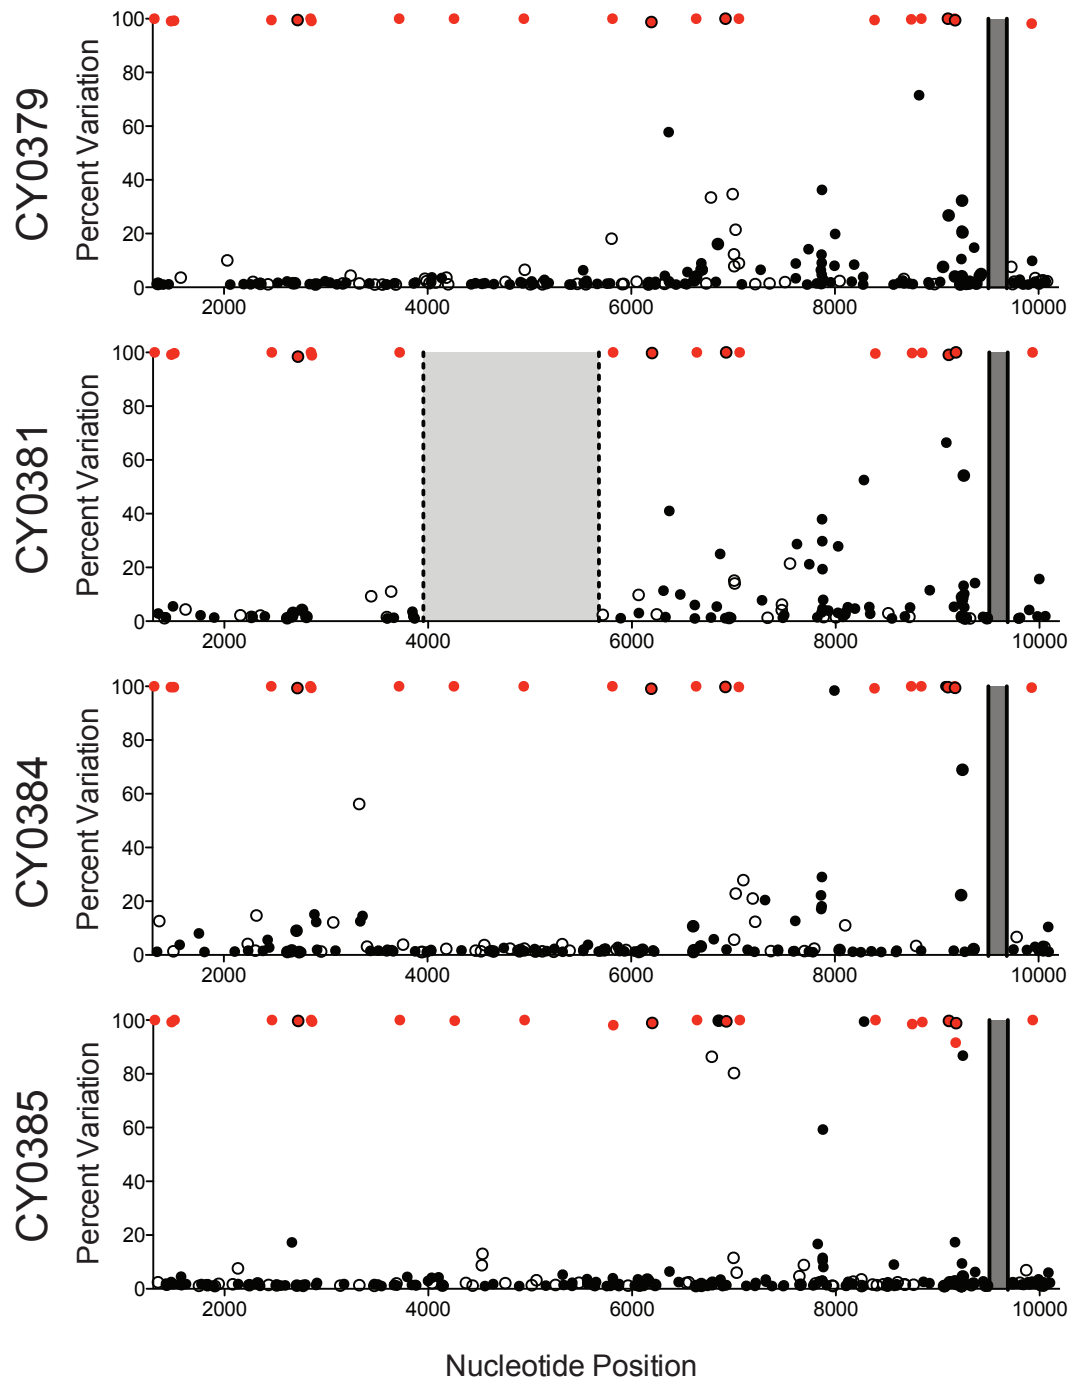

- The variant is engineered into m3KO $\Delta$ nef and is nonsynonymous
- ◐ The variant engineered into m3KO $\Delta$ nef is nonsynonymous in one reading frame and synonymous in another reading frame
- A nonsynonymous variant
- A synonymous variant
